# Supplementary material for: Lactobacillus delivery of bioactive interleukin-22
Source: PubMed Central journal article supplement (PMC5567760; doi:10.1186/s12934-017-0762-1), 2017-08-23
Supplement: 12934_2017_762_MOESM1_ESM.pdf [file 12934_2017_762_MOESM1_ESM.pdf]

## Supplemental data

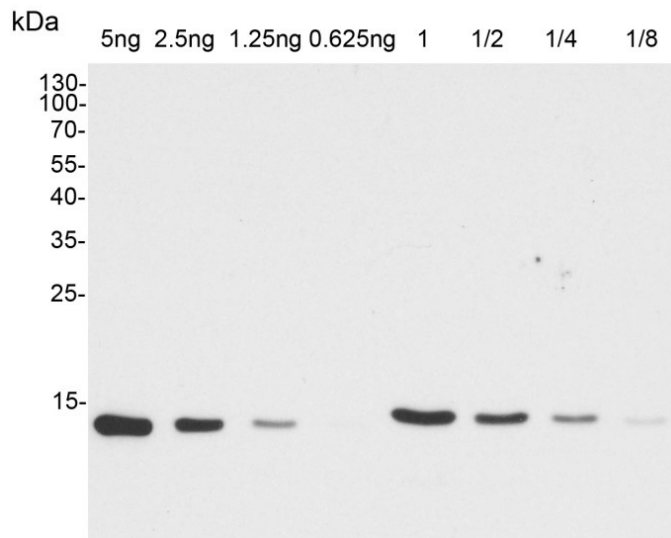

**Figure S1 Concentration of IL-22 as quantified by Western blot densitometry.** Dilutions of pure commercial IL-22 (5 ng to 0.625 ng) and culture supernatant were loaded onto the gel and detected by Western blot. The concentration of expressed protein in the supernatant was calculated with reference to the standard curve consisting of known concentrations of the purified reference protein.

**Table S1 Primers and synthetic genes used in this study.**

| Primer or gene       | Sequence (5'-3')                                                                                                                                                                                                                                                                                                                                                                                                                                                                                                                                                                                                                                      | Features                                                                                                               |
|----------------------|-------------------------------------------------------------------------------------------------------------------------------------------------------------------------------------------------------------------------------------------------------------------------------------------------------------------------------------------------------------------------------------------------------------------------------------------------------------------------------------------------------------------------------------------------------------------------------------------------------------------------------------------------------|------------------------------------------------------------------------------------------------------------------------|
| APFSalS              | CGCGT <u>CGAC</u> GATAAGGCAGAATAATGGAATAA                                                                                                                                                                                                                                                                                                                                                                                                                                                                                                                                                                                                             | Forward, Sall                                                                                                          |
| APFBamAS             | CGGGATCCTTCTACAATAGCAGCTTGAGCAGT                                                                                                                                                                                                                                                                                                                                                                                                                                                                                                                                                                                                                      | Reverse, BamHI                                                                                                         |
| APFSacS              | CGAGCTCTCAACTGTAAGTGGTTCAGAAGCT                                                                                                                                                                                                                                                                                                                                                                                                                                                                                                                                                                                                                       | Forward, SacI                                                                                                          |
| EcoAS2               | CGGAATTCCTTGAACCGTTTGTGGTGTCTGTTT                                                                                                                                                                                                                                                                                                                                                                                                                                                                                                                                                                                                                     | Forward, EcoRI                                                                                                         |
| prtPSacS             | CGGAGCTCAAGAAGACTTCGCTGCTTAACCAGT                                                                                                                                                                                                                                                                                                                                                                                                                                                                                                                                                                                                                     | Forward, SacI                                                                                                          |
| prtPSacAS            | CGGAGCTCCTATTCTTCACGTTGTTTCCGTT                                                                                                                                                                                                                                                                                                                                                                                                                                                                                                                                                                                                                       | Reverse, SacI                                                                                                          |
| IL-22 synthetic gene | <p><u>GGATCCTTGCCTGTCAACACCCGCTGTAAGCTGGAGGTCTCAA</u><br/>           ACTTTCAACAACCGTATATTGTGAATCGGACTTTTATGCTGGC<br/>           CAAGGAAGCGAGCTTAGCCGATAATAACACTGATGTTTCGTTTG<br/>           ATTGGGGAAAAGTTATTTCTGGGGCGTGTCCGCGAAGGATCAGT<br/>           GTTATTTGATGAAGCAAGTGCTGAACTTTACCCTGGAAGATGT<br/>           CTTGTTACCGCAGTCGGATCGGTTTTCAGCCATATATGCAAGAG<br/>           GTTGTGCCGTTTCTGACGAAATTGTCAAACCAATTGAGTTCGT<br/>           GCCATATTTCTGGCGATGATCAGAATATTCAAAGAAGCTCCG<br/>           TCGGCTGAAAGAAACCGTTAAGAAATTGGGCGAGTCTGGTGAG<br/>           ATTAAGGCGATTGGGGAAGTGGATTTGTTATTTATGTCACTGC<br/>           GGAATGCTTGCCTTTAAGAGCTC</p> | <p>For cloning in pAFβ100-IL22.<br/>           A similar gene without stop codon (TAA) was cloned in pAFβ900-IL22.</p> |
